# Supplementary material for: Li-ion and Na-ion insertion into size-controlled nickel hexacyanoferrate nanoparticles
Source: Royal Society of Chemistry journal article supplement (doi:10.1039/c4ra03296a), 2014-01-01
Supplement: c4ra03296a1.pdf [file c4ra03296a1.pdf]

**Supporting information**

**Li-ion and Na-ion Insertion into Size-controlled Nickel  
Hexacyanoferrate Nanoparticles**

Carissa H. Li,<sup>a</sup> Yusuke Nanba,<sup>b</sup> Daisuke Asakura,<sup>b</sup> Masashi Okubo,<sup>c,\*</sup>

and Daniel R. Talham<sup>a,\*</sup>

<sup>a</sup>Department of Chemistry, University of Florida, Gainesville, FL 32611-7200

<sup>b</sup>National Institute of Advanced Industrial Science and Technology (AIST), Umezono 1-1-1,  
Tsukuba, Ibaraki 305-8568, Japan

<sup>c</sup>Department of Chemical System Engineering, School of Engineering, The University of  
Tokyo, Hongo 7-3-1, Bunkyo-ku, Tokyo, 113-8656, Japan

To whom correspondence should be addressed: talham@chem.ufl.edu (D.R.T.),  
m-okubo@chemsys.t.u-tokyo.ac.jp (M.O.)

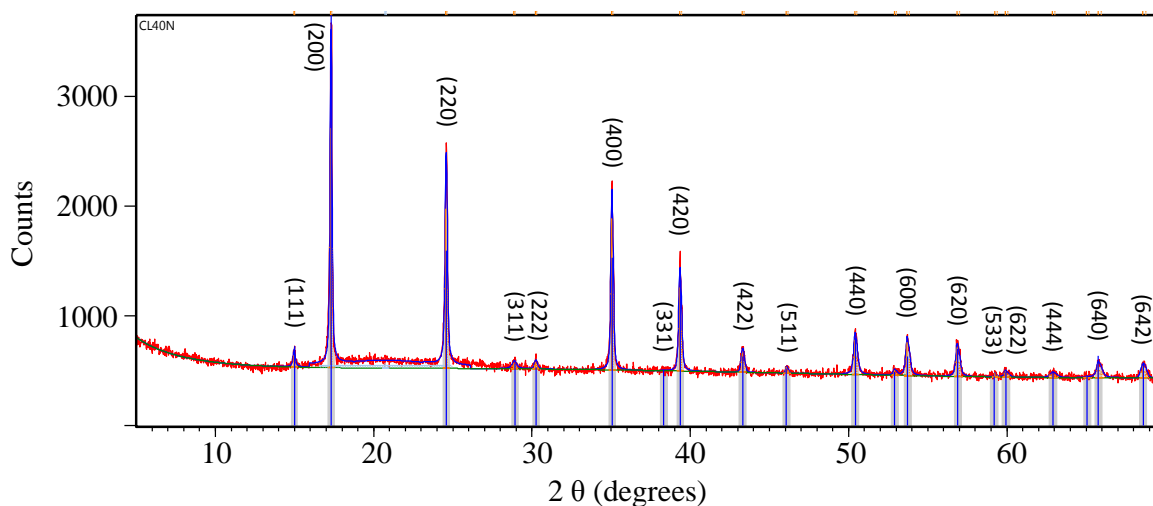

**Figure S1.** Room temperature X-Ray diffractogram of the 140 nm NiFe-PBA particle sample from  $2\theta = 5$  to 70 degrees. Using the (400) peak yields a lattice parameter of  $a = 10.23 \text{ \AA}$ .

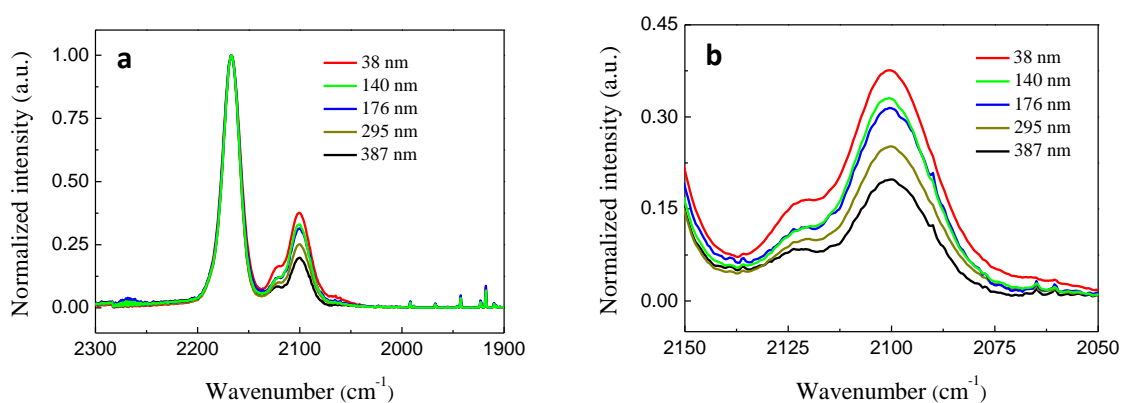

**Figure S2.** Room temperature FT-IR spectra for the NiFe-PBA particles of different sizes. a) The cyanide stretching region between  $2300 \text{ cm}^{-1}$  and  $1900 \text{ cm}^{-1}$ ; b) Zoom in spectra between  $2150 \text{ cm}^{-1}$  and  $2050 \text{ cm}^{-1}$ , revealing increase in the intensity of the  $\text{Fe}^{2+}\text{-CN-Ni}^{2+}$  stretching peak with decreasing size.
